# Supplementary material for: Sanitation value chains in low density settings in Indonesia and Vietnam: impetus for a rethink to achieve pro-poor outcomes
Source: Oxford University Press journal article supplement (doi:10.2166/washdev.2017.141), 2017-07-26
Supplement: washdev2017141supp.docx [file washdev2017141supp.docx]

**WASHDev-D-16-00141 Supplementary Data**

**Tables**

Table S1: Muong Ang communes (Vietnam), Model 1 material costs

|  | Bricks | Iron | Cement | Roof tile | Toilet pan |
| --- | --- | --- | --- | --- | --- |
| Muong Ang | 19.16 | 7.95 | 6.86 | 8.33 | – |
| Búng Lao | 23.18 | 6.15 | 8.52 | 9.08 | – |
| Ảng Tở | 33.35 | 7.95 | 8.99 | 8.39 | – |
| Ảng Cang | 18.92 | 4.92 | 7.10 | 8.71 | – |
| Nam Lich | 19.21 | 7.93 | 6.26 | 8.35 | – |
| Xuân Tre 2 | 19.37 | 8.00 | 6.32 | 8.42 | – |
| Quyết Tiến 1 | 18.67 | 7.71 | 6.09 | 8.12 | – |
| Nà Lấu | 18.96 | 7.83 | 6.18 | 8.24 | – |
| Tọ Nọ | 22.81 | 9.42 | 7.44 | 9.92 | – |
| Cha Nọ | 21.76 | 8.99 | 7.10 | 9.46 | – |
| Bua 1 | 20.85 | 8.61 | 6.80 | 9.06 | – |
| Giảng | 19.98 | 8.25 | 6.51 | 8.69 | – |

Table S2: Muong Ang communes (Vietnam), Model 2 material costs

|  | Bricks | Iron | Cement | Roof tile | Toilet pan |
| --- | --- | --- | --- | --- | --- |
| Muong Ang | 63.87 | 20.53 | 13.72 | 8.33 | – |
| Búng Lao | 77.26 | 15.89 | 17.03 | 9.08 | – |
| Ảng Tở | 111.18 | 20.53 | 17.98 | 8.39 | – |
| Ảng Cang | 63.06 | 12.71 | 14.19 | 8.71 | – |
| Nam Lich | 64.03 | 20.50 | 12.53 | 8.35 | – |
| Xuân Tre 2 | 64.56 | 20.67 | 12.63 | 8.42 | – |
| Quyết Tiến 1 | 62.24 | 19.92 | 12.18 | 8.12 | – |
| Nà Lấu | 63.18 | 20.23 | 12.36 | 8.24 | – |
| Tọ Nọ | 76.02 | 24.34 | 14.87 | 9.92 | – |
| Cha Nọ | 72.54 | 23.22 | 14.19 | 9.46 | – |
| Bua 1 | 69.50 | 22.25 | 13.60 | 9.06 | – |
| Giảng | 66.59 | 21.32 | 13.03 | 8.69 | – |

Table S3: Muong Ang communes (Vietnam), Model 3 material costs

|  | Bricks | Iron | Cement | Roof tile | Toilet pan |
| --- | --- | --- | --- | --- | --- |
| Muong Ang | 172.44 | 41.07 | 13.72 | 8.33 | 5.68 |
| Búng Lao | 208.59 | 31.78 | 17.03 | 9.08 | 9.46 |
| Ảng Tở | 300.18 | 41.07 | 17.98 | 8.39 | 28.39 |
| Ảng Cang | 170.27 | 25.42 | 14.19 | 8.71 | 8.52 |
| Nam Lich | 172.87 | 40.99 | 12.53 | 8.35 | 7.25 |
| Xuân Tre 2 | 174.32 | 41.33 | 12.63 | 8.42 | 7.47 |
| Quyết Tiến 1 | 168.05 | 39.85 | 12.18 | 8.12 | 7.18 |
| Nà Lấu | 170.60 | 40.45 | 12.36 | 8.24 | 7.82 |
| Tọ Nọ | 205.26 | 48.67 | 14.87 | 9.92 | 9.39 |
| Cha Nọ | 195.86 | 46.44 | 14.19 | 9.46 | 7.34 |
| Bua 1 | 187.64 | 44.49 | 13.60 | 9.06 | 7.76 |
| Giảng | 179.80 | 42.63 | 13.03 | 8.69 | 6.97 |

Table S4: Mai Chau communes (Vietnam), Model 1 material costs

|  | Bricks | Iron | Cement | Roof tile | Toilet pan | Sand |
| --- | --- | --- | --- | --- | --- | --- |
| Mai Chau | 35.48 | 4.34 | 6.39 | 7.57 | – | 8.52 |
| Tan Dan | 37.61 | 4.26 | 7.33 | 9.46 | – | 27.79 |
| Phu Bin | 34.06 | 5.75 | 7.33 | 9.08 | – | 15.38 |
| Hang Kia | 56.77 | 6.43 | 8.37 | 10.79 | – | 30.12 |
| Cun Pheo | 34.37 | 5.39 | 7.10 | 10.69 | – | 10.76 |
| Bao La | 28.39 | 5.11 | 6.62 | 7.57 | – | 10.88 |

Table S5: Mai Chau communes (Vietnam), Model 2 material costs

|  | Bricks | Iron | Cement | Roof tile | Toilet pan | Sand |
| --- | --- | --- | --- | --- | --- | --- |
| Mai Chau | 118.28 | 11.22 | 12.77 | 7.57 | – | 17.03 |
| Tan Dan | 125.37 | 11.00 | 14.67 | 9.46 | – | 55.59 |
| Phu Bin | 113.54 | 14.85 | 14.67 | 9.08 | – | 30.75 |
| Hang Kia | 189.24 | 16.62 | 16.75 | 10.79 | – | 60.24 |
| Cun Pheo | 114.57 | 13.93 | 14.19 | 10.69 | – | 21.53 |
| Bao La | 94.62 | 13.20 | 13.25 | 7.57 | – | 21.76 |

Table S6: Mai Chau communes (Vietnam), Model 3 material costs

|  | Bricks | Iron | Cement | Roof tile | Toilet pan | Sand |
| --- | --- | --- | --- | --- | --- | --- |
| Mai Chau | 319.34 | 22.44 | 12.77 | 7.57 | 7.57 | 42.58 |
| Tan Dan | 338.50 | 22.00 | 14.67 | 9.46 | 9.46 | 138.97 |
| Phu Bin | 306.57 | 29.70 | 14.67 | 9.08 | 8.99 | 76.88 |
| Hang Kia | 510.95 | 33.24 | 16.75 | 10.79 | 8.52 | 150.60 |
| Cun Pheo | 309.34 | 27.87 | 14.19 | 10.69 | 8.52 | 53.82 |
| Bao La | 255.47 | 26.40 | 13.25 | 7.57 | 7.57 | 54.41 |

Table S7: MT subdistricts (Indonesia), Model 1 material costs

|  | Bamboo | Wood | Sand | Gravel | Rock | Concrete brick | Cement | Iron | Pipe | Toilet pan | Zinc |
| --- | --- | --- | --- | --- | --- | --- | --- | --- | --- | --- | --- |
| Borong | 48.59 | 31.95 | 23.41 | 0 | 0 | 0 | 6.99 | 0 | 0 | 0 | 0 |
| Elar | 53.20 | 34.98 | 25.63 | 0 | 0 | 0 | 7.65 | 0 | 0 | 0 | 0 |
| Elar Selatan | 51.53 | 33.88 | 24.82 | 0 | 0 | 0 | 7.41 | 0 | 0 | 0 | 0 |
| Kota Komba | 46.69 | 30.70 | 22.49 | 0 | 0 | 0 | 6.72 | 0 | 0 | 0 | 0 |
| Lamba Leda | 58.94 | 38.75 | 0.00 | 0 | 0 | 0 | 8.48 | 0 | 0 | 0 | 0 |
| Poco Ranaka | 78.26 | 51.46 | 37.70 | 0 | 0 | 0 | 11.26 | 0 | 0 | 0 | 0 |
| Poco Ranaka Timur | 84.55 | 55.59 | 40.73 | 0 | 0 | 0 | 12.16 | 0 | 0 | 0 | 0 |
| Rana Mese | 48.44 | 31.85 | 23.33 | 0 | 0 | 0 | 6.97 | 0 | 0 | 0 | 0 |
| Sambi Rampas | 67.83 | 44.60 | 32.68 | 0 | 0 | 0 | 9.76 | 0 | 0 | 0 | 0 |

Table S8: MT subdistricts (Indonesia), Model 2 material costs

|  | Bamboo | Wood | Sand | Gravel | Rock | Concrete brick | Cement | Iron | Pipe | Toilet pan | Zinc |
| --- | --- | --- | --- | --- | --- | --- | --- | --- | --- | --- | --- |
| Borong | 41.26 | 52.99 | 82.51 | 28.01 | 24.22 | 46.93 | 69.64 | 10.60 | 7.57 | 0 | 28.01 |
| Elar | 52.92 | 67.97 | 105.84 | 35.93 | 31.07 | 60.20 | 89.34 | 13.59 | 9.71 | 0 | 35.93 |
| Elar Selatan | 51.44 | 66.07 | 102.88 | 34.92 | 30.20 | 58.52 | 86.83 | 13.21 | 9.44 | 0 | 34.92 |
| Kota Komba | 43.85 | 56.32 | 87.70 | 29.77 | 25.75 | 49.89 | 74.02 | 11.26 | 8.05 | 0 | 29.77 |
| Lamba Leda | 55.15 | 70.84 | 110.31 | 37.44 | 32.38 | 62.74 | 93.10 | 14.17 | 10.12 | 0 | 37.44 |
| Poco Ranaka | 51.89 | 66.65 | 103.79 | 35.23 | 30.47 | 59.03 | 87.60 | 13.33 | 9.52 | 0 | 35.23 |
| Poco Ranaka Timur | 74.59 | 95.81 | 149.19 | 50.64 | 43.80 | 84.86 | 125.92 | 19.16 | 13.69 | 0 | 50.64 |
| Rana Mese | 45.30 | 58.18 | 90.59 | 30.75 | 26.60 | 51.53 | 76.46 | 11.64 | 8.31 | 0 | 30.75 |
| Sambi Rampas | 66.22 | 85.05 | 132.43 | 44.95 | 38.88 | 75.33 | 111.78 | 17.01 | 12.15 | 0 | 44.95 |

Table S9: MT subdistricts (Indonesia), Model 3 material costs

|  | Bamboo | Wood | Sand | Gravel | Rock | Concrete brick | Cement | Iron | Pipe | Toilet pan | Zinc |
| --- | --- | --- | --- | --- | --- | --- | --- | --- | --- | --- | --- |
| Borong | 11.62 | 42.11 | 125.84 | 27.10 | 48.40 | 78.41 | 103.57 | 11.13 | 5.81 | 11.13 | 19.36 |
| Elar | 15.40 | 55.82 | 166.81 | 35.93 | 64.16 | 103.94 | 137.30 | 14.76 | 7.70 | 14.76 | 25.66 |
| Elar Selatan | 15.19 | 55.06 | 164.56 | 35.44 | 63.29 | 102.53 | 135.44 | 14.56 | 7.59 | 14.56 | 25.32 |
| Kota Komba | 12.79 | 46.38 | 138.61 | 29.85 | 53.31 | 86.37 | 114.09 | 12.26 | 6.40 | 12.26 | 21.32 |
| Lamba Leda | 15.75 | 57.08 | 170.59 | 36.74 | 65.61 | 106.29 | 140.41 | 15.09 | 7.87 | 15.09 | 26.24 |
| Poco Ranaka | 15.15 | 54.92 | 164.14 | 35.35 | 63.13 | 102.27 | 135.10 | 14.52 | 7.58 | 14.52 | 25.25 |
| Poco Ranaka Timur | 21.45 | 77.77 | 232.43 | 50.06 | 89.39 | 144.82 | 191.30 | 20.56 | 10.73 | 20.56 | 35.76 |
| Rana Mese | 12.98 | 47.05 | 140.60 | 30.28 | 54.08 | 87.60 | 115.72 | 12.44 | 6.49 | 12.44 | 21.63 |
| Sambi Rampas | 19.70 | 71.40 | 213.38 | 45.96 | 82.07 | 132.95 | 175.62 | 18.88 | 9.85 | 18.88 | 32.83 |

Table S10: TTU subdistricts (Indonesia), Model 1 material costs

|  | Bamboo | Wood | Sand | Gravel | Rock | Brick | Concrete brick | Cement | Rein-forcing iron | Pipe | Toilet pan | Zinc |
| --- | --- | --- | --- | --- | --- | --- | --- | --- | --- | --- | --- | --- |
| Biboki Anleu | 3.43 | 27.11 | 3.58 | 0.80 | 0.08 | 0.00 | 0.00 | 2.89 | 0.04 | 0.00 | 0.00 | 0.19 |
| Biboki Feotleu | 3.48 | 27.54 | 3.64 | 0.81 | 0.08 | 0.00 | 0.00 | 2.94 | 0.04 | 0.00 | 0.00 | 0.19 |
| Biboki Moenleu | 4.27 | 33.77 | 4.46 | 1.00 | 0.09 | 0.00 | 0.00 | 3.60 | 0.05 | 0.00 | 0.00 | 0.24 |
| Biboki Tampah | 3.69 | 29.17 | 3.85 | 0.86 | 0.08 | 0.00 | 0.00 | 3.11 | 0.04 | 0.00 | 0.00 | 0.20 |
| Biboki Utara | 3.15 | 24.93 | 3.29 | 0.74 | 0.07 | 0.00 | 0.00 | 2.66 | 0.04 | 0.00 | 0.00 | 0.18 |
| Biboki Selatan | 3.19 | 25.24 | 3.33 | 0.74 | 0.07 | 0.00 | 0.00 | 2.69 | 0.04 | 0.00 | 0.00 | 0.18 |
| Bikomi Nilulat | 6.46 | 51.08 | 6.74 | 1.51 | 0.14 | 0.00 | 0.00 | 5.45 | 0.07 | 0.00 | 0.00 | 0.36 |
| Bikomi Selatan | 4.41 | 34.92 | 4.61 | 1.03 | 0.10 | 0.00 | 0.00 | 3.73 | 0.05 | 0.00 | 0.00 | 0.25 |
| Bikomi Tengah | 6.46 | 51.08 | 6.74 | 1.51 | 0.14 | 0.00 | 0.00 | 5.45 | 0.07 | 0.00 | 0.00 | 0.36 |
| Bikomi Utara | 6.79 | 53.74 | 7.10 | 1.59 | 0.15 | 0.00 | 0.00 | 5.74 | 0.08 | 0.00 | 0.00 | 0.38 |
| Insana | 6.07 | 48.05 | 6.34 | 1.42 | 0.13 | 0.00 | 0.00 | 5.13 | 0.07 | 0.00 | 0.00 | 0.34 |
| Insana Barat | 5.66 | 44.78 | 5.91 | 1.32 | 0.13 | 0.00 | 0.00 | 4.78 | 0.06 | 0.00 | 0.00 | 0.31 |
| Insana Fafinisu | 6.49 | 51.38 | 6.78 | 1.52 | 0.14 | 0.00 | 0.00 | 5.48 | 0.07 | 0.00 | 0.00 | 0.36 |
| Insana Tengah | 6.43 | 50.84 | 6.71 | 1.50 | 0.14 | 0.00 | 0.00 | 5.43 | 0.07 | 0.00 | 0.00 | 0.36 |
| Insana Utara | 5.82 | 46.06 | 6.08 | 1.36 | 0.13 | 0.00 | 0.00 | 4.92 | 0.06 | 0.00 | 0.00 | 0.32 |
| Kota Kefa | 5.58 | 44.12 | 5.82 | 1.30 | 0.12 | 0.00 | 0.00 | 4.71 | 0.06 | 0.00 | 0.00 | 0.31 |
| Miomafo Barat | 6.38 | 50.47 | 6.66 | 1.49 | 0.14 | 0.00 | 0.00 | 5.39 | 0.07 | 0.00 | 0.00 | 0.35 |
| Miomafo Tengah | 6.79 | 53.74 | 7.10 | 1.59 | 0.15 | 0.00 | 0.00 | 5.74 | 0.08 | 0.00 | 0.00 | 0.38 |
| Miomafo Timur | 5.44 | 43.03 | 5.68 | 1.27 | 0.12 | 0.00 | 0.00 | 4.59 | 0.06 | 0.00 | 0.00 | 0.30 |
| Musi | 6.03 | 47.69 | 6.30 | 1.41 | 0.13 | 0.00 | 0.00 | 5.09 | 0.07 | 0.00 | 0.00 | 0.33 |
| Mutis | 5.91 | 46.78 | 6.18 | 1.38 | 0.13 | 0.00 | 0.00 | 4.99 | 0.07 | 0.00 | 0.00 | 0.33 |
| Naibinu | 7.07 | 55.92 | 7.38 | 1.65 | 0.16 | 0.00 | 0.00 | 5.97 | 0.08 | 0.00 | 0.00 | 0.39 |
| Noemuti | 4.60 | 36.37 | 4.80 | 1.07 | 0.10 | 0.00 | 0.00 | 3.88 | 0.05 | 0.00 | 0.00 | 0.26 |
| Noemuti Timur | 4.48 | 35.40 | 4.67 | 1.04 | 0.10 | 0.00 | 0.00 | 3.78 | 0.05 | 0.00 | 0.00 | 0.25 |

Table S11: TTU subdistricts (Indonesia), Model 2 material costs

|  | Bamboo | Wood | Sand | Gravel | Rock | Brick | Concrete brick | Cement | Rein-forcing iron | Pipe | Toilet pan | Zinc |
| --- | --- | --- | --- | --- | --- | --- | --- | --- | --- | --- | --- | --- |
| Biboki Anleu | 1.94 | 37.13 | 27.58 | 1.77 | 16.44 | 10.96 | 4.77 | 50.21 | 0.53 | 3.01 | 0.00 | 22.45 |
| Biboki Feotleu | 2.06 | 39.38 | 29.25 | 1.88 | 17.44 | 11.63 | 5.06 | 53.25 | 0.56 | 3.19 | 0.00 | 23.81 |
| Biboki Moenleu | 2.10 | 40.11 | 29.80 | 1.91 | 17.76 | 11.84 | 5.16 | 54.24 | 0.57 | 3.25 | 0.00 | 24.26 |
| Biboki Tampah | 1.82 | 34.81 | 25.86 | 1.66 | 15.41 | 10.28 | 4.48 | 47.07 | 0.50 | 2.82 | 0.00 | 21.05 |
| Biboki Utara | 1.75 | 33.47 | 24.86 | 1.59 | 14.82 | 9.88 | 4.30 | 45.26 | 0.48 | 2.71 | 0.00 | 20.24 |
| Biboki Selatan | 1.86 | 35.49 | 26.36 | 1.69 | 15.72 | 10.48 | 4.56 | 47.99 | 0.51 | 2.87 | 0.00 | 21.46 |
| Bikomi Nilulat | 2.35 | 44.91 | 33.36 | 2.14 | 19.89 | 13.26 | 5.77 | 60.74 | 0.64 | 3.64 | 0.00 | 27.16 |
| Bikomi Selatan | 1.94 | 37.06 | 27.53 | 1.76 | 16.41 | 10.94 | 4.76 | 50.11 | 0.53 | 3.00 | 0.00 | 22.41 |
| Bikomi Tengah | 2.32 | 44.23 | 32.86 | 2.11 | 19.59 | 13.06 | 5.69 | 59.82 | 0.63 | 3.58 | 0.00 | 26.75 |
| Bikomi Utara | 2.17 | 41.50 | 30.83 | 1.98 | 18.38 | 12.25 | 5.34 | 56.13 | 0.59 | 3.36 | 0.00 | 25.10 |
| Insana | 2.10 | 40.06 | 29.76 | 1.91 | 17.74 | 11.83 | 5.15 | 54.17 | 0.57 | 3.24 | 0.00 | 24.22 |
| Insana Barat | 1.94 | 36.95 | 27.45 | 1.76 | 16.36 | 10.91 | 4.75 | 49.97 | 0.53 | 2.99 | 0.00 | 22.35 |
| Insana Fafinisu | 2.18 | 41.63 | 30.92 | 1.98 | 18.43 | 12.29 | 5.35 | 56.29 | 0.59 | 3.37 | 0.00 | 25.17 |
| Insana Tengah | 2.20 | 41.98 | 31.19 | 2.00 | 18.59 | 12.40 | 5.40 | 56.78 | 0.60 | 3.40 | 0.00 | 25.39 |
| Insana Utara | 2.06 | 39.32 | 29.21 | 1.87 | 17.41 | 11.61 | 5.06 | 53.18 | 0.56 | 3.18 | 0.00 | 23.78 |
| Kota Kefa | 2.02 | 38.57 | 28.65 | 1.84 | 17.08 | 11.39 | 4.96 | 52.17 | 0.55 | 3.12 | 0.00 | 23.33 |
| Miomafo Barat | 2.32 | 44.30 | 32.91 | 2.11 | 19.62 | 13.08 | 5.70 | 59.92 | 0.63 | 3.59 | 0.00 | 26.79 |
| Miomafo Tengah | 2.41 | 46.07 | 34.22 | 2.19 | 20.40 | 13.60 | 5.92 | 62.31 | 0.66 | 3.73 | 0.00 | 27.86 |
| Miomafo Timur | 2.09 | 39.82 | 29.58 | 1.90 | 17.64 | 11.76 | 5.12 | 53.86 | 0.57 | 3.22 | 0.00 | 24.08 |
| Musi | 2.24 | 42.72 | 31.73 | 2.03 | 18.92 | 12.61 | 5.49 | 57.77 | 0.61 | 3.46 | 0.00 | 25.83 |
| Mutis | 2.27 | 43.25 | 32.13 | 2.06 | 19.15 | 12.77 | 5.56 | 58.49 | 0.62 | 3.50 | 0.00 | 26.16 |
| Naibinu | 2.13 | 40.70 | 30.23 | 1.94 | 18.02 | 12.02 | 5.23 | 55.04 | 0.58 | 3.29 | 0.00 | 24.61 |
| Noemuti | 1.89 | 36.16 | 26.86 | 1.72 | 16.02 | 10.68 | 4.65 | 48.91 | 0.52 | 2.93 | 0.00 | 21.87 |
| Noemuti Timur | 1.87 | 35.75 | 26.56 | 1.70 | 15.83 | 10.56 | 4.60 | 48.35 | 0.51 | 2.89 | 0.00 | 21.62 |

Table S12: TTU subdistricts (Indonesia), Model 3 material costs

|  | Bamboo | Wood | Sand | Gravel | Rock | Brick | Concrete brick | Cement | Rein-forcing iron | Pipe | Toilet pan | Zinc |
| --- | --- | --- | --- | --- | --- | --- | --- | --- | --- | --- | --- | --- |
| Biboki Anleu | 0 | 26.70 | 56.33 | 22.68 | 19.39 | 44.26 | 16.82 | 95.46 | 35.48 | 8.78 | 13.90 | 25.97 |
| Biboki Feotleu | 0 | 27.61 | 58.24 | 23.45 | 20.04 | 45.76 | 17.40 | 98.70 | 36.68 | 9.08 | 14.37 | 26.85 |
| Biboki Moenleu | 0 | 27.43 | 57.87 | 23.30 | 19.92 | 45.47 | 17.29 | 98.08 | 36.45 | 9.02 | 14.28 | 26.68 |
| Biboki Tampah | 0 | 24.53 | 51.76 | 20.84 | 17.81 | 40.67 | 15.46 | 87.72 | 32.60 | 8.07 | 12.77 | 23.86 |
| Biboki Utara | 0 | 23.95 | 50.53 | 20.34 | 17.39 | 39.70 | 15.09 | 85.63 | 31.83 | 7.87 | 12.47 | 23.30 |
| Biboki Selatan | 0 | 25.83 | 54.49 | 21.94 | 18.75 | 42.82 | 16.28 | 92.36 | 34.32 | 8.49 | 13.45 | 25.12 |
| Bikomi Nilulat | 0 | 30.12 | 63.54 | 25.58 | 21.87 | 49.92 | 18.98 | 107.69 | 40.02 | 9.90 | 15.68 | 29.29 |
| Bikomi Selatan | 0 | 24.47 | 51.63 | 20.78 | 17.77 | 40.56 | 15.42 | 87.50 | 32.52 | 8.05 | 12.74 | 23.80 |
| Bikomi Tengah | 0 | 30.09 | 63.49 | 25.56 | 21.85 | 49.88 | 18.96 | 107.60 | 39.99 | 9.89 | 15.67 | 29.27 |
| Bikomi Utara | 0 | 27.44 | 57.88 | 23.30 | 19.92 | 45.48 | 17.29 | 98.10 | 36.46 | 9.02 | 14.28 | 26.69 |
| Insana | 0 | 28.29 | 59.69 | 24.03 | 20.54 | 46.90 | 17.83 | 101.16 | 37.60 | 9.30 | 14.73 | 27.52 |
| Insana Barat | 0 | 25.12 | 52.99 | 21.33 | 18.24 | 41.63 | 15.83 | 89.80 | 33.38 | 8.26 | 13.08 | 24.43 |
| Insana Fafinisu | 0 | 27.43 | 57.87 | 23.30 | 19.92 | 45.47 | 17.29 | 98.08 | 36.45 | 9.02 | 14.28 | 26.68 |
| Insana Tengah | 0 | 27.19 | 57.36 | 23.09 | 19.74 | 45.07 | 17.13 | 97.21 | 36.13 | 8.94 | 14.15 | 26.45 |
| Insana Utara | 0 | 24.84 | 52.40 | 21.10 | 18.03 | 41.17 | 15.65 | 88.81 | 33.00 | 8.17 | 12.93 | 24.16 |
| Kota Kefa | 0 | 26.71 | 56.35 | 22.69 | 19.39 | 44.28 | 16.83 | 95.51 | 35.49 | 8.78 | 13.91 | 25.98 |
| Miomafo Barat | 0 | 29.73 | 62.71 | 25.25 | 21.58 | 49.28 | 18.73 | 106.29 | 39.50 | 9.77 | 15.47 | 28.91 |
| Miomafo Tengah | 0 | 31.08 | 65.57 | 26.40 | 22.57 | 51.52 | 19.59 | 111.12 | 41.30 | 10.22 | 16.18 | 30.23 |
| Miomafo Timur | 0 | 27.44 | 57.88 | 23.30 | 19.92 | 45.48 | 17.29 | 98.10 | 36.46 | 9.02 | 14.28 | 26.69 |
| Musi | 0 | 29.54 | 62.32 | 25.09 | 21.45 | 48.97 | 18.62 | 105.62 | 39.25 | 9.71 | 15.38 | 28.73 |
| Mutis | 0 | 29.49 | 62.22 | 25.05 | 21.41 | 48.88 | 18.58 | 105.45 | 39.19 | 9.70 | 15.35 | 28.68 |
| Naibinu | 0 | 25.87 | 54.57 | 21.97 | 18.78 | 42.88 | 16.30 | 92.49 | 34.37 | 8.50 | 13.47 | 25.16 |
| Noemuti | 0 | 24.35 | 51.38 | 20.68 | 17.68 | 40.37 | 15.35 | 87.08 | 32.36 | 8.01 | 12.68 | 23.69 |
| Noemuti Timur | 0 | 23.91 | 50.45 | 20.31 | 17.36 | 39.64 | 15.07 | 85.50 | 31.78 | 7.86 | 12.45 | 23.26 |
